# Supplementary material for: Distribution, silencing potential and evolutionary impact of promoter DNA methylation in the human genome
Source: Springer Nature journal article supplement (doi:10.1038/ng1990), 2007-03-04
Supplement: ng1990-S7.pdf [file ng1990-S7.pdf]

**Supplementary Table 1. Promoter DNA methylation of germline-specific genes in primary fibroblasts and sperm.** Promoter DNA methylation levels are given as normalized log<sub>2</sub> ratios after fibroblast and sperm arrays have been scaled to have the same median-absolute-deviation (see Material and Methods). Most HCP and ICP promoters are hypermethylated in fibroblasts and hypomethylated in sperm, whereas LCP promoters show little difference between both states. NA indicates that the promoter was absent on the array or did not pass the promoter quality filtering.

| Gene name       | Promoter class | 5mC (log <sub>2</sub> ) in fibroblasts | 5mC (log <sub>2</sub> ) in sperm |
|-----------------|----------------|----------------------------------------|----------------------------------|
| <i>ACRBP</i>    | HCP            | 0.707                                  | -0.032                           |
| <i>ADAM30</i>   | HCP            | 0.879                                  | -0.457                           |
| <i>ALF</i>      | HCP            | 0.735                                  | -0.306                           |
| <i>AURKC</i>    | HCP            | 0.972                                  | -0.148                           |
| <i>BOLL</i>     | HCP            | 0.690                                  | 0.143                            |
| <i>BRDT</i>     | HCP            | 1.035                                  | -0.438                           |
| <i>C1orf14</i>  | HCP            | 0.594                                  | -0.121                           |
| <i>CABYR</i>    | HCP            | 0.113                                  | -0.089                           |
| <i>CATSPER2</i> | HCP            | 0.637                                  | 0.209                            |
| <i>CKLFSF2</i>  | HCP            | 0.758                                  | -0.033                           |
| <i>DAZL</i>     | HCP            | 0.566                                  | 0.027                            |
| <i>DKKL1</i>    | HCP            | 0.112                                  | 0.535                            |
| <i>DMRT1</i>    | HCP            | -0.195                                 | -0.151                           |
| <i>FTMT</i>     | HCP            | 0.648                                  | 0.006                            |
| <i>GAPDS</i>    | HCP            | 0.367                                  | 0.287                            |
| <i>HNRNPG-T</i> | HCP            | 0.618                                  | -0.022                           |
| <i>HRLP5</i>    | HCP            | 0.138                                  | 0.023                            |
| <i>HSPB9</i>    | HCP            | 0.626                                  | 0.105                            |
| <i>INSL6</i>    | HCP            | 0.897                                  | -0.757                           |
| <i>LPIN1</i>    | HCP            | 0.651                                  | 0.078                            |
| <i>MORC</i>     | HCP            | 0.557                                  | -0.144                           |
| <i>MOV10L1</i>  | HCP            | 0.808                                  | 0.046                            |
| <i>NYD-SP20</i> | HCP            | 0.584                                  | 0.094                            |
| <i>ODF2</i>     | HCP            | 0.132                                  | 0.186                            |
| <i>PAPOLB</i>   | HCP            | 0.654                                  | -0.270                           |
| <i>PHF7</i>     | HCP            | -0.232                                 | 0.311                            |
| <i>PIAS2</i>    | HCP            | -0.003                                 | -0.361                           |
| <i>POTE14</i>   | HCP            | 1.559                                  | 0.303                            |
| <i>POTE15</i>   | HCP            | 1.415                                  | -0.327                           |
| <i>REC8L1</i>   | HCP            | 0.531                                  | 0.025                            |
| <i>RPL10L</i>   | HCP            | 0.804                                  | -0.202                           |
| <i>SOX30</i>    | HCP            | 1.042                                  | -0.493                           |
| <i>SPA17</i>    | HCP            | -0.071                                 | -0.026                           |
| <i>SPACA1</i>   | HCP            | 0.340                                  | 0.092                            |
| <i>SPAG6</i>    | HCP            | -0.119                                 | -0.158                           |
| <i>SPATA4</i>   | HCP            | -0.101                                 | -0.309                           |
| <i>SPO11</i>    | HCP            | 0.910                                  | -0.489                           |
| <i>SSTK</i>     | HCP            | 0.522                                  | -0.054                           |
| <i>STK31</i>    | HCP            | 0.733                                  | -0.433                           |
| <i>SYCP1</i>    | HCP            | 0.326                                  | -0.039                           |
| <i>SYCP2</i>    | HCP            | 0.789                                  | -0.315                           |
| <i>TCP11</i>    | HCP            | 0.428                                  | 0.056                            |
| <i>TPTE</i>     | HCP            | 0.596                                  | 0.052                            |
| <i>TPX1</i>     | HCP            | 0.218                                  | -0.669                           |
| <i>TRPM4</i>    | HCP            | 0.676                                  | 0.193                            |
| <i>TSP50</i>    | HCP            | 0.355                                  | 0.088                            |
| <i>TULP2</i>    | HCP            | 0.926                                  | -0.060                           |
| <i>ZBPB</i>     | HCP            | 0.257                                  | -0.249                           |
| <i>ZBPB2</i>    | HCP            | 0.479                                  | -0.144                           |

|          |     |        |        |
|----------|-----|--------|--------|
| ACTL7B   | ICP | 0.445  | 0.005  |
| ADAM18   | ICP | 0.412  | -0.232 |
| ADAM2    | ICP | 0.948  | -0.242 |
| ANKRD7   | ICP | 0.491  | 0.008  |
| CTCF     | ICP | 0.347  | 0.574  |
| DDX4     | ICP | 0.717  | -0.683 |
| H1t      | ICP | 1.133  | -0.389 |
| LDHC     | ICP | 0.795  | -0.458 |
| NOHMA    | ICP | 0.498  | -0.119 |
| PDHA2    | ICP | 0.622  | -0.671 |
| POTE8    | ICP | 0.727  | 0.039  |
| PPP3R2   | ICP | 0.788  | -0.521 |
| PRAME    | ICP | 0.757  | -0.213 |
| PRM2     | ICP | 0.535  | 0.523  |
| PRSS21   | ICP | 0.341  | 0.488  |
| RNF17    | ICP | 0.825  | -0.435 |
| STK22B   | ICP | 0.921  | 0.780  |
| TCEB3B   | ICP | 0.994  | -0.296 |
| TDRD1    | ICP | 0.982  | 0.048  |
| TENR     | ICP | 0.759  | -0.352 |
| TEX12    | ICP | 0.906  | -0.183 |
| TSH2B    | ICP | 1.545  | -0.885 |
| TUBA2    | ICP | 0.799  | -0.216 |
| AKAP3    | LCP | -0.286 | -0.174 |
| ASB17    | LCP | -0.114 | -0.455 |
| ATP6V1E2 | LCP | -0.746 | 0.144  |
| CATSPER1 | LCP | 0.704  | 0.656  |
| CATSPER3 | LCP | 0.483  | 0.200  |
| CCIN     | LCP | 1.000  | 0.551  |
| CST8     | LCP | 0.090  | 0.318  |
| CST9L    | LCP | -0.154 | 0.130  |
| CYLC2    | LCP | -0.583 | -0.353 |
| FSCN3    | LCP | 0.098  | 0.087  |
| HANP1    | LCP | 0.695  | -0.783 |
| KLHL10   | LCP | 0.478  | 0.412  |
| LEMD1    | LCP | -1.037 | -0.537 |
| MS4A5    | LCP | 0.214  | 0.093  |
| OAZ3     | LCP | 0.289  | 0.230  |
| ODF1     | LCP | 0.891  | 0.487  |
| PGK2     | LCP | -0.358 | -0.665 |
| SPACA4   | LCP | 0.642  | 0.622  |
| SPATA3   | LCP | 0.453  | 0.467  |
| TEX15    | LCP | -0.729 | -0.560 |
| TNP1     | LCP | 0.574  | 0.266  |
| TSGA10   | LCP | -0.315 | -0.147 |
| UBQLN3   | LCP | -0.220 | 0.183  |
| ACRV1    | NA  |        |        |
| CTAGE1   | NA  |        |        |
| DDX43    | NA  |        |        |
| GK2      | NA  |        |        |
| ODF4     | NA  |        |        |
| PRM1     | NA  |        |        |
| PRM3     | NA  |        |        |
| SPAM1    | NA  |        |        |
| SYCP3    | NA  |        |        |
